# Supplementary material
Source: publisher site journal article supplement (https://www.spandidos-publications.com/4893/downloadSupplementary)

Figure S1. Anti-proliferative effect of UA or DOX on colorectal cancer cell lines HCT116 and HT29. Cells were treated with DMSO, UA or DOX for 48 h and cell viability was assessed using MTT assay. \* $P < 0.05$  and \*\*\* $P < 0.001$  vs. CONT. CONT, control; DMSO, dimethyl sulfoxide; UA, ursolic acid; DOX, doxorubicin.

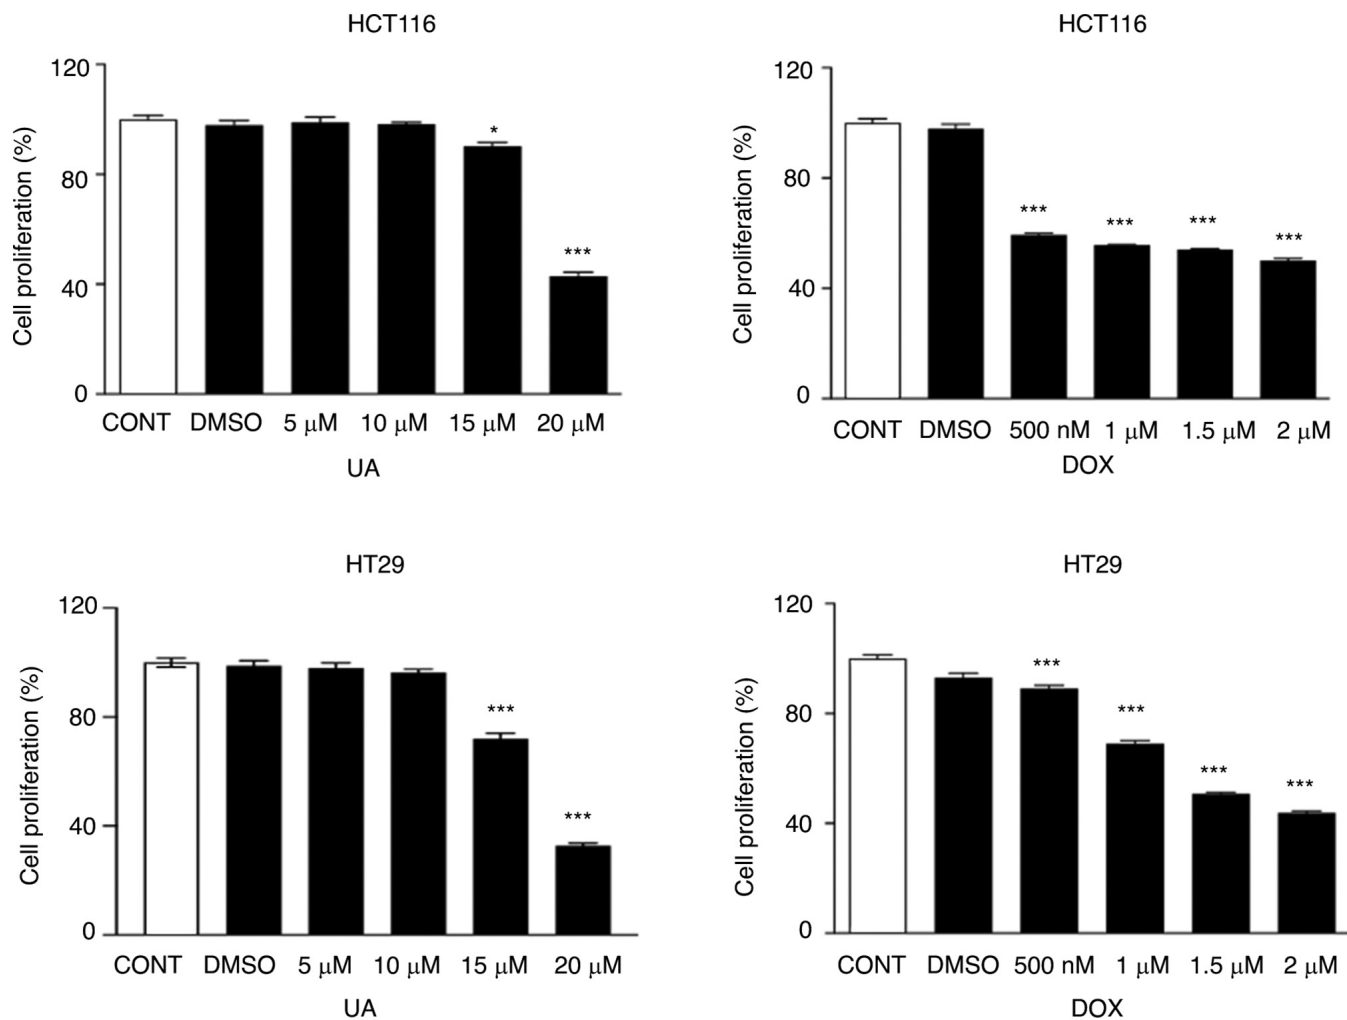

Figure S2. Representative flow cytometry plots for the groups quantified in Fig. 1C and Fig. 3A. CONT, control; UA, ursolic acid; DOX, doxorubicin.

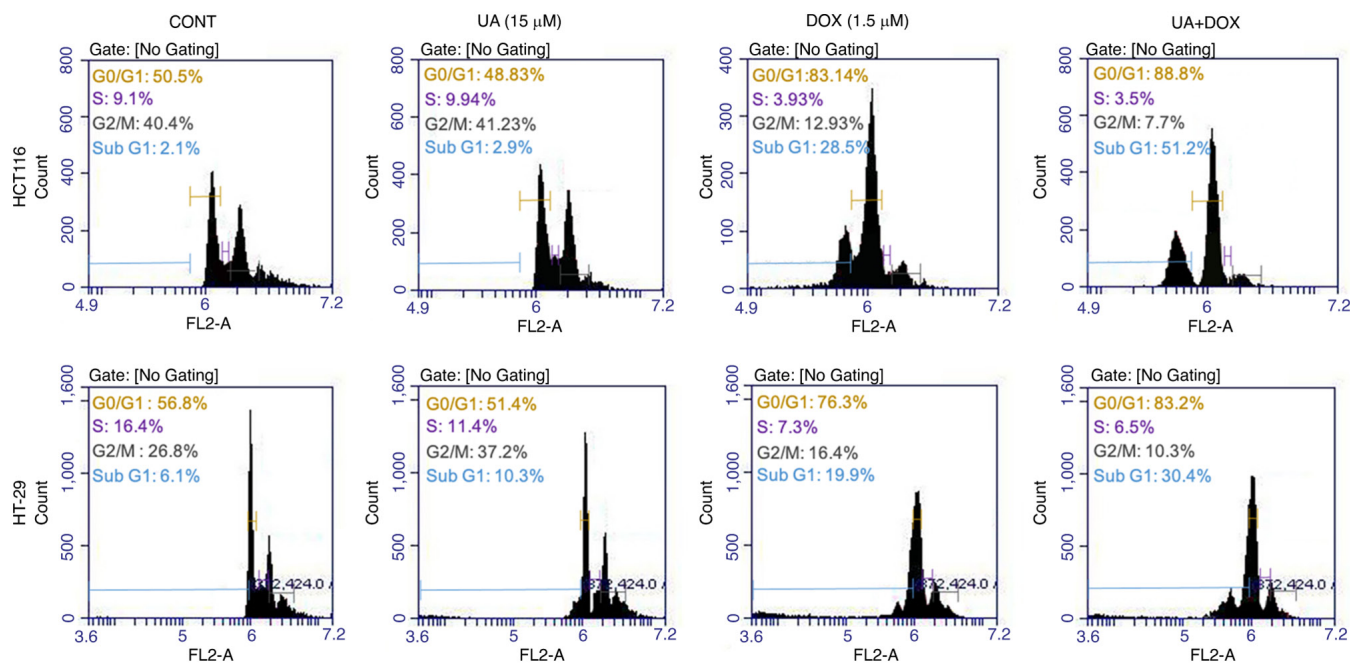

Supplement: Supplementary file 1 [file downloadSupplementary]
